# Supplementary material for: Molecular Mechanisms Underlying the Elevated Expression of a Potentially Type 2 Diabetes Mellitus Associated SCD1 Variant
Source: MDPI journal article supplement (doi:10.3390/ijms23116221), 2022-06-02
Supplement: s1 [file s1]

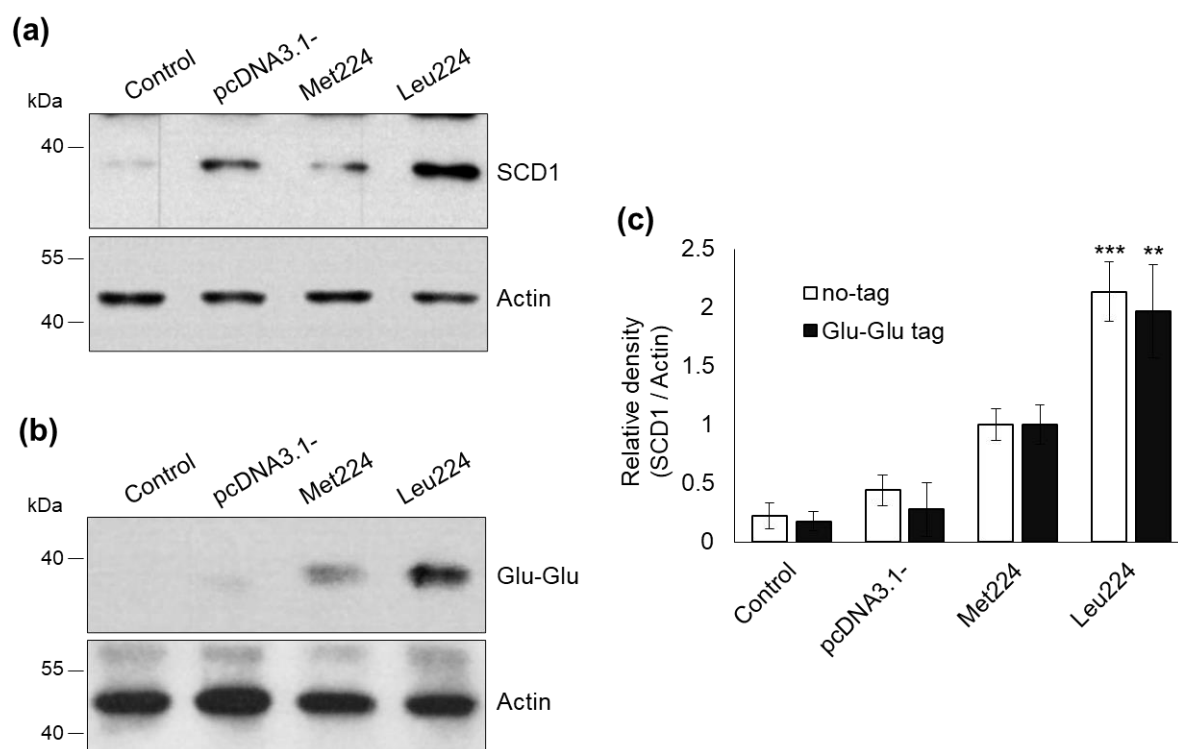

**Figure S1.** Expression of M224L variants of stearoyl-CoA desaturase-1 in transiently transfected HepG2 cells. HepG2 cells were harvested and processed 24 h after transfection. Aliquots of cell lysates (5  $\mu$ g) were loaded on 12% SDS-polyacrylamide gel, transferred to Immobilon-P membrane and SCD1 was detected with an anti-SCD1 (a) and an anti-Glu-Glu tag (b) antibodies, respectively. Actin was measured as loading control. Representative immunoblots of three independent experiments are shown. The band intensities were quantitated by densitometry and SCD1/Actin ratios are shown as bar graphs (c). Data are shown as mean values  $\pm$  S.D. Statistical analysis was performed with the Tukey-Kramer Multiple Comparisons Test. \*\* $p < 0.01$ ; \*\*\* $p < 0.001$ .

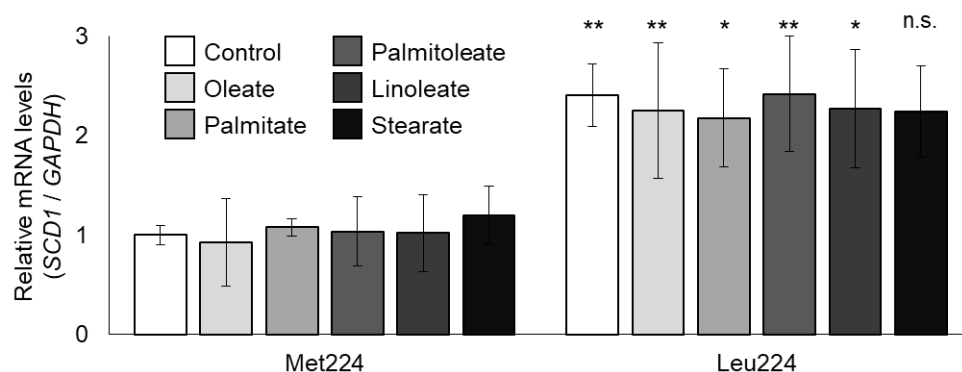

**Figure S2.** Effect of various fatty acids on the mRNA expression of M224L SCD1 variants in HEK293T cells. qPCR was carried out using GAPDH and SCD1-Glu-Glu tag sequence specific primers as indicated in *Materials and Methods*. The diagram presented depicts the results of three independent measurements. Statistical analysis was performed with the Tukey-Kramer Multiple Comparisons Test. Data are shown as mean values  $\pm$  S.D. \* $p < 0.05$ ; \*\* $p < 0.01$ ; n.s.: non-significant difference

**Table S1.** Intracellular amount of C16:0, C16:1, C:18:0 and C18:1 fatty acids in M224L SCD1 overexpressing HEK293T cells.

|                  | Amount of fatty acid (µg/mg) |        |                         |        |                     |        |                   |         |
|------------------|------------------------------|--------|-------------------------|--------|---------------------|--------|-------------------|---------|
|                  | C16:0<br>(palmitate)         |        | C16:1<br>(palmitoleate) |        | C18:0<br>(stearate) |        | C18:1<br>(oleate) |         |
| <b>Control</b>   | 25.20                        | ± 1.29 | 11.52                   | ± 0.42 | 11.48               | ± 0.52 | 32.27             | ± 1.36  |
| <b>pcDNA3.1-</b> | 25.39                        | ± 0.91 | 11.02                   | ± 0.37 | 12.21               | ± 0.74 | 31.66             | ± 1.62  |
| <b>Met224</b>    | 27.11                        | ± 3.74 | 18.73                   | ± 2.23 | 12.50               | ± 1.87 | 37.95             | ± 5.20  |
| <b>Leu224</b>    | 40.36                        | ± 7.74 | 29.30                   | ± 5.77 | 18.77               | ± 3.48 | 70.83             | ± 12.86 |
